# Supplementary material for: Stochastic errors vs. modeling errors in distance based phylogenetic reconstructions
Source: Springer Nature journal article supplement (doi:10.1186/1748-7188-7-22), 2012-08-31

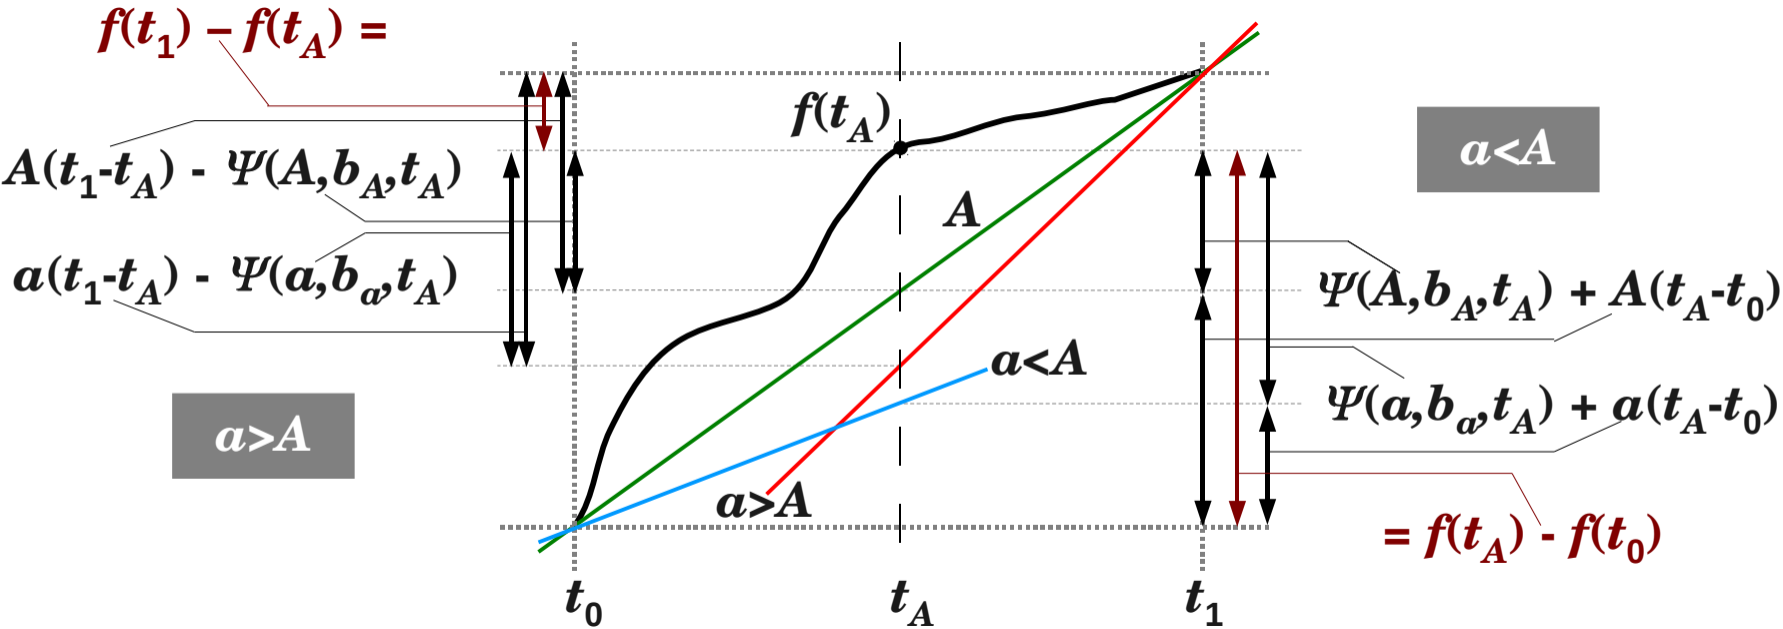

Supplement: 13015_2011_163_MOESM7_ESM.pdf [file 13015_2011_163_MOESM7_ESM.pdf]
